# Supplementary material for: Lassa Virus Treatment Options
Source: PubMed Central journal article supplement (PMC8067676; doi:10.3390/microorganisms9040772), 2021-04-07
Supplement: microorganisms-09-00772-s001.pdf [file microorganisms-09-00772-s001.pdf]

**Supplementary Table S1: Abbreviation key**

| <b>Abbreviation</b> | <b>Definition</b>                   |
|---------------------|-------------------------------------|
| LASV                | Lassa virus                         |
| LF                  | Lassa Fever                         |
| RdRp                | RNA-dependent RNA polymerase        |
| GPC                 | Glycoprotein precursor complex      |
| GP                  | Glycoprotein                        |
| Mastomys            | <i>Mastomys natalensis</i>          |
| NHP                 | Non-human primate                   |
| RMP                 | Ribavirin monophosphate             |
| IMPDH               | Inosine monophosphate dehydrogenase |
| GTP                 | Guanosine triphosphate              |
| RTP                 | Ribavirin triphosphate              |
| AST                 | Aspartate aminotransferase          |
| LNI                 | Log10 neutralization index          |
| MAB                 | Monoclonal antibody                 |
| huMAB               | Human monoclonal antibody           |

**Supplementary Table S2: Chemical Structures**

| Ribavirin                                                                                                | Favipiravir                                                                                               |
|----------------------------------------------------------------------------------------------------------|-----------------------------------------------------------------------------------------------------------|
| 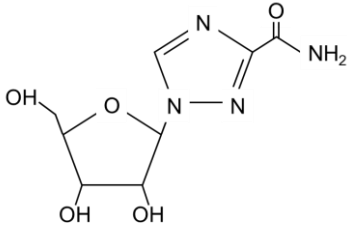 <p>MW: 244.2 g/mol</p> |  <p>MW: 157.1 g/mol</p> |
| Stampidine                                                                                               | ST-193                                                                                                    |
|  <p>MW: 544.3 g/mol</p> |  <p>MW: 371.5 g/mol</p> |

**Supplementary Table S3.** Therapeutics for LASV in rodent animal models.

| Animal Model       | Challenge                                   | Treatment Regimen                                                                                                 | Survival | Reference |
|--------------------|---------------------------------------------|-------------------------------------------------------------------------------------------------------------------|----------|-----------|
| <b>Ribavirin</b>   |                                             |                                                                                                                   |          |           |
| Ifnar-/-B6 mouse   | IP 1,000 FFU<br>LASV Ba366                  | 1) 80 mg/kg per day IP starting 0 dpi to death (N=5)                                                              | 1) 0%    | [49]      |
|                    |                                             | 2) 80 mg/kg per day IP starting 4 dpi to death (N=5)                                                              | 2) 0%    |           |
|                    |                                             | 3) 80 mg/kg twice per day IP starting 4 dpi to 11 (N=5)                                                           | 3) 20%   |           |
|                    |                                             | 4) Placebo treated starting 4 dpi to death (N=3)                                                                  | 4) 0%    |           |
| Hartley Guinea Pig | IP 1x10 <sup>5</sup><br>TCID50 GPA-<br>LASV | 1) 50 mg/kg per day SQ starting 2 dpi to 14 dpi (N=9)                                                             | 1) 0%    | [53]      |
|                    |                                             | 2) Placebo treated starting 2 dpi to death (N=9)                                                                  | 2) 0%    |           |
| <b>Favipiravir</b> |                                             |                                                                                                                   |          |           |
| Hartley Guinea Pig | IP 1x10 <sup>5</sup><br>TCID50 GPA-<br>LASV | 1) 150 mg/kg per day SQ starting 2 dpi to 14 dpi (N=9)                                                            | 1) 78%   | [53]      |
|                    |                                             | 2) 300 mg/kg per day SQ starting 2 dpi to 14 dpi (N=9)                                                            | 2) 100%  |           |
|                    |                                             | 3) Placebo treated starting 2 dpi to death (N=9)                                                                  | 3) 0%    |           |
| Hartley Guinea Pig | IP 1x10 <sup>5</sup><br>TCID50 GPA-<br>LASV | 1) 300 mg/kg per day SQ starting 5 dpi (N=6)                                                                      | 1) 100%  | [53]      |
|                    |                                             | 2) 300 mg/kg per day SQ starting 7 dpi (N=6)                                                                      | 2) 100%  |           |
|                    |                                             | 3) 300 mg/kg per day SQ starting 9 dpi (N=6)                                                                      | 3) 83%   |           |
|                    |                                             | 4) Placebo treated starting 5 dpi (N=6)                                                                           | 4) 0%    |           |
| IFNAR-/-B6 mouse   | IP 1,000 FFU<br>LASV Ba366                  | 1) 75 mg/kg per day oral starting 4 dpi to death (N=5)                                                            | 1) 0%    | [49]      |
|                    |                                             | 2) 150 mg/kg per day oral starting 4 dpi to death (N=5)                                                           | 2) 0%    |           |
|                    |                                             | 3) 300 mg/kg per day oral starting 4 dpi to 11 dpi (N=5)                                                          | 3) 100%  |           |
|                    |                                             | 4) Placebo treated group starting 4 dpi to 9 dpi (N=7)                                                            | 4) 0%    |           |
| <b>ST-193</b>      |                                             |                                                                                                                   |          |           |
| Hartley Guinea Pig | SQ 1,000 pfu<br>LASV Josiah                 | 1) 25 mg/kg per day IP starting 1 h pre infection to day 14 (N=8)                                                 | 1) 63%   | [81]      |
|                    |                                             | 2) 80 mg/kg per day IP starting 1 h pre infection to day 14 (N=8)                                                 | 2) 63%   |           |
|                    |                                             | 3) Ribavirin control: 25 mg/kg per day IP starting 1 h preinfection to day 14 (N=8)                               | 3) 0%    |           |
|                    |                                             | 4) Vehicle control starting 1 h preinfecton to day 14 (N=7)                                                       | 4) 0%    |           |
| <b>Stampidine</b>  |                                             |                                                                                                                   |          |           |
| CBA mouse          | IC 1,000 pfu<br>LASV Josiah                 | 1) 25 mg/kg per day IP starting 24 h pre infection + 1 h preinfection + every subsequent 24 h until 96 h (N=8)    | 1) 75%   | [78]      |
|                    |                                             | 2) 50 mg/kg per day IP starting 24 h pre infection + 1 h preinfection + every subsequent 24 h until 96 h (N = 10) | 2) 90%   |           |
|                    |                                             | 3) Vehicle treatment with same regimen (N=18)                                                                     | 3) 28%   |           |

IP = Intraperitoneal. SQ = Subcutaneous. IC = Intracerebral DPI = Days post infection. N = group size. PFU = plaque forming units. FFU = Fluorescent focus units. GPA = Guinea pig adapted. LASV = Lassa virus.

**Supplementary Table S4.** Antibody based therapeutics for LASV in rodent animal models.

| Animal Model                  | Challenge                              | Treatment Regimen                                                     | Survival | Reference |
|-------------------------------|----------------------------------------|-----------------------------------------------------------------------|----------|-----------|
| <b>Immune Plasma</b>          |                                        |                                                                       |          |           |
| Strain 13 Guinea Pig          | SQ 1x10 <sup>3.4</sup> PFU LASV Josiah | Plasma from Hartley guinea pigs 32 days convalescent                  | 1) 0%    | [94]      |
|                               |                                        | 1) 6 mL/kg of LNI .3, IFA 2,560 plasma given 0, 3, and 6 dpi (N = 10) | 2) 0%    |           |
|                               |                                        | 2) 6 mL/kg of LNI .1, IFA 640 plasma given 0, 3, and 6 dpi (N = 10)   | 3) 0%    |           |
|                               |                                        | 3) 6 mL/kg of LNI .1, IFA 160 plasma given 0, 3, and 6 dpi (N = 10)   | 4) 0%    |           |
| 4) Control plasma (N = 10)    |                                        |                                                                       |          |           |
| Strain 13 Guinea Pig          | SQ 1x10 <sup>3.4</sup> PFU LASV Josiah | Plasma from Hartley guinea pigs 45 days convalescent                  | 1) 0%    | [94]      |
|                               |                                        | 1) 6 mL/kg of LNI .9, IFA 2,560 plasma given 0, 3, and 6 dpi          | 2) 0%    |           |
|                               |                                        | 2) 6 mL/kg of LNI .6, IFA 320 plasma given 0, 3, and 6 dpi (N = 10)   | 3) 0%    |           |
|                               |                                        | 3) 6 mL/kg of LNI .3, IFA 160 plasma given 0, 3, and 6 dpi (N = 10)   | 4) 0%    |           |
| 4) Control plasma (N = 10)    |                                        |                                                                       |          |           |
| Strain 13 Guinea Pig          | SQ 1x10 <sup>3.4</sup> PFU LASV Josiah | Plasma from Hartley guinea pigs 90 days convalescent                  | 1) 100%  | [94]      |
|                               |                                        | 1) 6 mL/kg of LNI 3.4, IFA 2,560 plasma given 0, 3, and 6 dpi         | 2) 100%  |           |
|                               |                                        | 2) 6 mL/kg of LNI 3.1, IFA 640 plasma given 0, 3, and 6 dpi (N = 10)  | 3) 90%   |           |
|                               |                                        | 3) 6 mL/kg of LNI 2.0, IFA 160 plasma given 0, 3, and 6 dpi (N = 10)  | 4) 50%   |           |
|                               |                                        | 4) 6 mL/kg of LNI 1.4, IFA 40 plasma given 0, 3, and 6 dpi (N = 10)   | 5) 0%    |           |
| 5) Control plasma (N = 10)    |                                        |                                                                       |          |           |
| Strain 13 Guinea Pig          | SQ 1x10 <sup>3.4</sup> PFU LASV Josiah | Plasma from Hartley guinea pigs 180 days convalescent                 | 1) 100%  | [94]      |
|                               |                                        | 1) 6 mL/kg of LNI 3.8, IFA 2,560 plasma given 0, 3, and 6 dpi         | 2) 100%  |           |
|                               |                                        | 2) 6 mL/kg of LNI 2.8, IFA 640 plasma given 0, 3, and 6 dpi (N = 10)  | 3) 80%   |           |
|                               |                                        | 3) 6 mL/kg of LNI 2.2, IFA 320 plasma given 0, 3, and 6 dpi (N = 10)  | 4) 30%   |           |
|                               |                                        | 4) 6 mL/kg of LNI 1.5, IFA 40 plasma given 0, 3, and 6 dpi (N = 10)   | 5) 0%    |           |
|                               |                                        | 5) 6 mL/kg of LNI 0.8, IFA 10 plasma given 0, 3, and 6 dpi (N = 10)   | 6) 0%    |           |
| 6) Control plasma (N = 10)    |                                        |                                                                       |          |           |
| Strain 13 Guinea Pig          | SQ 1x10 <sup>3.4</sup> PFU LASV Josiah | Plasma from Hartley guinea pigs 60 days convalescent                  | 1) 0%    | [94]      |
|                               |                                        | 1) 1 mL/kg LNI 2.2 plasma given 0, 3, and 6 dpi (N = 10)              | 2) 50%   |           |
|                               |                                        | 2) 3 mL/kg LNI 2.2 plasma given 0, 3, and 6 dpi (N = 10)              | 3) 100%  |           |
|                               |                                        | 3) 6 mL/kg LNI 2.2 plasma given 0, 3, and 6 dpi (N = 10)              | 4) 100%  |           |
|                               |                                        | 4) 12 mL/kg LNI 2.2 plasma given 0, 3, and 6 dpi (N = 10)             | 5) 0%    |           |
| 5) Untreated control (N = 10) |                                        |                                                                       |          |           |
| Strain 13 Guinea Pig          | SQ 1x10 <sup>3.4</sup> PFU LASV Josiah | Plasma from Hartley guinea pigs 180 days convalescent                 | 1) 10%   | [94]      |
|                               |                                        | 1) 1 mL/kg LNI 2.0 plasma given 0, 3, and 6 dpi (N = 10)              | 2) 60%   |           |
|                               |                                        | 2) 3 mL/kg LNI 2.0 plasma given 0, 3, and 6 dpi (N = 10)              | 3) 100%  |           |
|                               |                                        | 3) 6 mL/kg LNI 2.0 plasma given 0, 3, and 6 dpi (N = 10)              | 4) 100%  |           |
|                               |                                        | 4) 12 mL/kg LNI 2.0 plasma given 0, 3, and 6 dpi (N = 10)             | 5) 0%    |           |
| 5) Untreated control (N = 10) |                                        |                                                                       |          |           |
| Strain 13 Guinea Pig          | SQ 1x10 <sup>4</sup> PFU LASV Josiah   | Plasma from Rhesus Macaque convalescent 180-240 days                  | 1) 100%  | [94]      |
|                               |                                        | 1) 6 mL/kg LNI 3.6 plasma given 0, 3, and 6 dpi (N=5)                 | 2) 100%  |           |
|                               |                                        | 2) 1) 6 mL/kg LNI 2.5 plasma given 0, 3, and 6 dpi (N=5)              | 3) 0%    |           |
|                               |                                        | 3) 6 mL/kg LNI 1.2 plasma given 0, 3, and 6 dpi (N=5)                 | 4) 0%    |           |
|                               |                                        | 4) 6 mL/kg LNI 0.5 plasma given 0, 3, and 6 dpi (N=5)                 | 5) 0%    |           |
| 5) Control plasma (N=5)       |                                        |                                                                       |          |           |
| Strain 13 Guinea Pig          | SQ 1x10 <sup>4</sup> PFU LASV Josiah   | Plasma from human 2-3 years convalescent                              | 1) 0%    | [94]      |
|                               |                                        | 1) 3 mL/kg LNI 1.6 plasma given 0, 3, and 6 dpi (N = 10)              | 2) 50%   |           |
|                               |                                        | 2) 6 mL/kg LNI 1.6 plasma given 0, 3, and 6 dpi (N = 10)              | 3) 100%  |           |
|                               |                                        | 3) 12 mL/kg LNI 1.6 plasma given 0, 3, and 6 dpi (N = 10)             | 4) 0%    |           |
| 4) No treatment (N = 10)      |                                        |                                                                       |          |           |
| Strain 13 Guinea Pig          | SQ 1x10 <sup>4.3</sup> PFU LASV Z-132  | Plasma from human 2-3 years convalescent                              | 1) 80%   | [94]      |
|                               |                                        | 1) 3 mL/kg LNI 2.8 plasma given 0, 3, and 6 dpi (N = 10)              | 2) 100%  |           |
|                               |                                        | 2) 6 mL/kg LNI 2.8 plasma given 0, 3, and 6 dpi (N = 10)              | 3) 100%  |           |
|                               |                                        | 3) 12 mL/kg LNI 2.8 plasma given 0, 3, and 6 dpi (N = 10)             | 4) 0%    |           |
| 4) No treatment (N = 10)      |                                        |                                                                       |          |           |
| <b>HuMAb 25.6A</b>            |                                        |                                                                       |          |           |

|                     |                                 |                                                                                                                   |                  |       |
|---------------------|---------------------------------|-------------------------------------------------------------------------------------------------------------------|------------------|-------|
| Hartley Guinea Pig  | IP 1,000 pfu of GPA LASV Josiah | 1) 30 mg/kg given after given 0, 3, and 6 dpi IP (N = 5)<br>2) Pooled untreated and human IgG1 controls (N = 18)  | 1) 100%<br>2) 6% | [101] |
| <b>HuMAb 2.9D</b>   |                                 |                                                                                                                   |                  |       |
| Hartley Guinea Pig  | IP 1,000 pfu of GPA LASV Josiah | 1) 30 mg/kg given after given 0, 3, and 6 dpi IP (N = 5)<br>2) Pooled untreated and human IgG1 controls (N = 18)  | 1) 100%<br>2) 6% | [101] |
| <b>HuMAb 8.9F</b>   |                                 |                                                                                                                   |                  |       |
| Hartley Guinea Pig  | IP 1,000 PFU of GPA LASV Josiah | 1) 30 mg/kg given after given 0, 3, and 6 dpi IP (N = 5)<br>2) Pooled untreated and human IgG1 controls (N = 18)  | 1) 100%<br>2) 6% | [101] |
| <b>HuMAb 12.1F</b>  |                                 |                                                                                                                   |                  |       |
| Hartley Guinea Pig  | IP 1,000 PFU of GPA LASV Josiah | 1) 30 mg/kg given after given 0, 3, and 6 dpi IP (N = 5)<br>2) Pooled untreated and human IgG1 controls (N = 18)  | 1) 100%<br>2) 6% | [101] |
| <b>HuMAb 37.7H</b>  |                                 |                                                                                                                   |                  |       |
| Hartley Guinea Pig  | IP 1,000 PFU of GPA LASV Josiah | 1) 30 mg/kg given after given 0, 3, and 6 dpi IP (N = 5)<br>2) Pooled untreated and human IgG1 controls (N = 18)  | 1) 100%<br>2) 6% | [101] |
| <b>HuMAb 37.2D</b>  |                                 |                                                                                                                   |                  |       |
| Hartley Guinea Pig  | IP 1,000 PFU of GPA LASV Josiah | 1) 30 mg/kg given after given 0, 3, and 6 dpi IP (N = 10)<br>2) Pooled untreated and human IgG1 controls (N = 18) | 1) 90%<br>2) 6%  | [101] |
| <b>HuMAb 19.7E</b>  |                                 |                                                                                                                   |                  |       |
| Hartley Guinea Pig  | IP 1,000 PFU of GPA LASV Josiah | 1) 30 mg/kg given after given 0, 3, and 6 dpi IP (N = 10)<br>2) Pooled untreated and human IgG1 controls (N = 18) | 1) 90%<br>2) 6%  | [101] |
| <b>HuMAb 37.2G</b>  |                                 |                                                                                                                   |                  |       |
| Hartley Guinea Pig  | IP 1,000 PFU of GPA LASV Josiah | 1) 30 mg/kg given after given 0, 3, and 6 dpi IP (N = 5)<br>2) Pooled untreated and human IgG1 controls (N = 18)  | 1) 80%<br>2) 6%  | [101] |
| <b>HuMAb 10.4B</b>  |                                 |                                                                                                                   |                  |       |
| Hartley Guinea Pig  | IP 1,000 PFU of GPA LASV Josiah | 1) 30 mg/kg given after given 0, 3, and 6 dpi IP (N = 5)<br>2) Pooled untreated and human IgG1 controls (N = 18)  | 1) 40%<br>2) 6%  | [101] |
| <b>HuMAb 25.10C</b> |                                 |                                                                                                                   |                  |       |
| Hartley Guinea Pig  | IP 1,000 PFU of GPA LASV Josiah | 1) 30 mg/kg given after given 0, 3, and 6 dpi IP (N = 5)<br>2) Pooled untreated and human IgG1 controls (N = 18)  | 1) 30%<br>2) 6%  | [101] |
| <b>HuMAb 36.1F</b>  |                                 |                                                                                                                   |                  |       |
| Hartley Guinea Pig  | IP 1,000 PFU of GPA LASV Josiah | 1) 30 mg/kg given after given 0, 3, and 6 dpi IP (N = 5)<br>2) Pooled untreated and human IgG1 controls (N = 18)  | 1) 20%<br>2) 6%  | [101] |

LNI = Log10 neutralization index = [Log10 (PFU in control)-Log10 (PFU in test serum)] (LNI determined based on challenge strain)(Jahrling 1983). IFA = Indirect fluorescent antibody. SQ = Subcutaneous. IP= Intraperitoneal. IV = Intravenous. DPI = Days post infection. N = group size. PFU = plaque forming units. GPA = Guinea pig adapted. LASV = Lassa virus.
